# Supplementary material
Source: PubMed Central journal article supplement (PMC7852056)
Supplement: 41390_2021_1363_MOESM2_ESM.pdf [file 41390_2021_1363_MOESM2_ESM.pdf]

**Online Resource 1: Study characteristics for all patients: Sepsis and any AKI (N=4,898)**

| Category, N (%) *                               | No Sepsis<br>No AKI (1)<br>N=3,173 (64.8%) | Sepsis<br>No AKI (2)<br>N=450 (9.2%) | No Sepsis<br>AKI (3)<br>N=968 (19.8%) | Sepsis<br>AKI (4)<br>N=307 (6.3%) | *P-Value         |
|-------------------------------------------------|--------------------------------------------|--------------------------------------|---------------------------------------|-----------------------------------|------------------|
| <b>Demographics/Clinical</b>                    |                                            |                                      |                                       |                                   |                  |
| Age at ICU Admission (years)                    | 5.8 (1.7, 12.6)                            | 3.8 (1.4, 11.9)                      | 5.9 (1.3, 13.7)                       | 6.0 (1.4, 13)                     | 0.112            |
| Male Gender                                     | 1,740 (54.9%)                              | 235 (52.2%)                          | 545 (56.3%)                           | 164 (53.4%)                       | 0.746            |
| Weight at ICU Admission (kg)                    | 20 (11, 41.9)                              | 15.1 (9.7, 34)                       | 20 (10, 45)                           | 20 (10.1, 46.2)                   | <b>0.016</b>     |
| Any Comorbid Conditions                         | 2,528 (79.7%)                              | 377 (83.8%)                          | 823 (85%)                             | 265 (86.3%)                       | 0.339            |
| <b>Admission Diagnosis</b>                      |                                            |                                      |                                       |                                   |                  |
| Shock                                           | 540 (17%)                                  | 239 (53.1%)                          | 222 (22.9%)                           | 209 (68.1%)                       | <b>&lt;0.001</b> |
| Medical Cardiac                                 | 112 (3.5%)                                 | 13 (2.9%)                            | 62 (6.4%)                             | 10 (3.3%)                         | 0.772            |
| Respiratory Failure                             | 1,130 (35.6%)                              | 218 (48.4%)                          | 390 (40.3%)                           | 135 (44%)                         | 0.226            |
| Post-Surgical/Minor Trauma                      | 1,128 (35.6%)                              | 34 (7.6%)                            | 259 (26.8%)                           | 23 (7.5%)                         | 0.974            |
| CNS Dysfunction                                 | 592 (18.7%)                                | 99 (22%)                             | 163 (16.8%)                           | 58 (18.9%)                        | 0.301            |
| Pain/Sedation Management                        | 130 (4.1%)                                 | 8 (1.8%)                             | 27 (2.8%)                             | 7 (2.3%)                          | 0.626            |
| History of Transplant                           | 69 (2.2%)                                  | 17 (3.8%)                            | 91 (9.4%)                             | 39 (12.7%)                        | <b>&lt;0.001</b> |
| PRISM-III                                       | 2 (0, 5)                                   | 4 (0, 10.5)                          | 3 (0, 7)                              | 8 (4, 13)                         | <b>&lt;0.001</b> |
| PIM-2                                           | 1 (0, 3)                                   | 1.5 (1, 4)                           | 1 (1, 4)                              | 3 (1, 5)                          | 0.091            |
| PELOD                                           | 2 (0, 11)                                  | 10 (1, 12)                           | 10 (1, 11)                            | 11 (10, 12)                       | <b>0.007</b>     |
| Any Severity Score >75 <sup>th</sup> Percentile | 370 (25.5%)                                | 105 (45.9%)                          | 160 (39.2%)                           | 79 (60.3%)                        | <b>0.008</b>     |
| <b>Outcomes</b>                                 |                                            |                                      |                                       |                                   |                  |
| Mechanical Ventilation Use                      | 840 (27.8%)                                | 182 (43.3%)                          | 348 (36.9%)                           | 158 (52.3%)                       | <b>0.017</b>     |
| CRRT Use                                        | 8 (0.3%)                                   | 2 (0.4%)                             | 27 (2.8%)                             | 29 (9.5%)                         | <b>&lt;0.001</b> |
| ECMO Use                                        | 4 (0.1%)                                   | 6 (1.3%)                             | 10 (1%)                               | 6 (1.9%)                          | 0.560            |
| 28-Day Mortality                                | 62 (1.9%)                                  | 21 (4.7%)                            | 44 (4.5%)                             | 37 (12.1%)                        | <b>&lt;0.001</b> |
| 28-Day MV-Free Days                             | 26 (22, 27)                                | 24 (19, 26)                          | 23 (17, 26)                           | 21 (9.5, 24)                      | <b>&lt;0.001</b> |
| 28-Day ICU-Free Days                            | 25 (23, 26)                                | 24 (20, 25)                          | 23 (19, 25)                           | 21 (13, 25)                       | <b>&lt;0.001</b> |
| Complex ICU course                              | 262 (8.3%)                                 | 76 (16.9%)                           | 182 (18.8%)                           | 106 (34.5%)                       | <b>&lt;0.001</b> |

ICU = Intensive Care Unit, AKI = Acute Kidney Injury, PRISM-III = Pediatric Risk of Mortality 3, PIM-2 = Pediatric Index of Mortality 2, PELOD= Pediatric Logistic Organ Dysfunction, CNS = Central Nervous System, MV = Mechanical Ventilation, CRRT = Continuous Renal Replacement Therapy, ECMO = Extracorporeal Membrane Oxygenation, Severity Score based on full sample (N=4,898); \* = Sepsis NO AKI (2) vs. Sepsis ANY AKI (4)

All continuous summaries presented as Medians (25<sup>th</sup> – 75<sup>th</sup>); P-Values calculated using Wilcoxon tests for continuous variables and Chi-square/Fisher’s tests for categorical variables; CRRT Use, ECMO Use, and 28-Day Mortality assumed to be “No” if missing; Complex ICU course indicated by any of: mortality, ICU duration > 14 days, mechanical ventilation > 7 days, CRRT Use, ECMO use; Patients that did not have any of these five conditions were defaulted to non-complex ICU course. >75<sup>th</sup> percentile for severity of illness scores data shown are the number of patients with an available SOI score above the 75<sup>th</sup> percentile for that entire subgrouping (e.g., No Sepsis/No AKI – 25.5% = 370 of 1,449 with a SOI score in that group were > 75<sup>th</sup> percentile). Available SOI scores in each group for this table: No Sepsis/No AKI: 1449 (45.7%), Sepsis/No AKI: 229 (50.9%), No Sepsis/ANY AKI: 408 (42.1%), Sepsis/ANY AKI: 131 (42.7%)
