# Supplementary material
Source: PubMed Central journal article supplement (PMC7852056)
Supplement: 41390_2021_1363_MOESM3_ESM.pdf [file 41390_2021_1363_MOESM3_ESM.pdf]

**Outline Resource 2: Complex ICU outcome in septic patients (n=757)**

| Category, N (row %)                             | Non-Complex ICU<br>N=575 (76%) | Complex ICU<br>N=182 (24%) | Bivariable        |                  | Multivariable <sup>2</sup> |                  |
|-------------------------------------------------|--------------------------------|----------------------------|-------------------|------------------|----------------------------|------------------|
|                                                 |                                |                            | OR (95% CI)       | P-Value          | OR (95% CI)                | P-Value          |
| Age at ICU Admission (years) <sup>1</sup>       | 4.9 (1.4, 12.5)                | 4.5 (1.3, 11.5)            | 0.97 (0.84, 1.11) | 0.622            |                            |                  |
| Gender                                          |                                |                            |                   |                  |                            |                  |
| Male                                            | 298 (74.7%)                    | 101 (25.3%)                | 1.16 (0.83, 1.62) | 0.388            |                            |                  |
| Female                                          | 277 (77.4%)                    | 81 (22.6%)                 | Reference         |                  |                            |                  |
| Weight at ICU Admission (kg) <sup>1</sup>       | 16.6 (9.9, 40.7)               | 15.1 (9.5, 32.8)           | 0.97 (0.94, 1.01) | 0.112            |                            |                  |
| Any Comorbid Conditions                         | 483 (75.2%)                    | 159 (24.8%)                | 1.32 (0.81, 2.15) | 0.272            |                            |                  |
| Admission Diagnosis                             |                                |                            |                   |                  |                            |                  |
| Shock                                           | 320 (71.4%)                    | 128 (28.6%)                | 1.89 (1.32, 2.70) | <b>0.001</b>     |                            |                  |
| Medical Cardiac                                 | 11 (47.8%)                     | 12 (52.2%)                 | 3.62 (1.57, 8.35) | <b>0.003</b>     | 5.32 (1.27, 22.3)          | <b>0.022</b>     |
| Respiratory Failure                             | 239 (67.7%)                    | 114 (32.3%)                | 2.36 (1.67, 3.32) | <b>&lt;0.001</b> | 3.22 (1.88, 5.52)          | <b>&lt;0.001</b> |
| Post-Surgical/Minor Trauma                      | 46 (80.7%)                     | 11 (19.3%)                 | 0.74 (0.38, 1.46) | 0.385            |                            |                  |
| CNS Dysfunction                                 | 122 (77.7%)                    | 35 (22.3%)                 | 0.88 (0.58, 1.35) | 0.565            |                            |                  |
| Pain/Sedation Management                        | 11 (73.3%)                     | 4 (26.7%)                  | 1.15 (0.36, 3.66) | 0.810            |                            |                  |
| PRISM-III                                       | 4 (0, 9)                       | 10 (5, 19)                 | 1.12 (1.08, 1.17) | <b>&lt;0.001</b> |                            |                  |
| PIM-2                                           | 1 (1, 3.5)                     | 4 (2, 16)                  | 1.08 (1.04, 1.13) | <b>&lt;0.001</b> |                            |                  |
| PELOD                                           | 10 (1, 12)                     | 12 (11, 21)                | 1.08 (1.04, 1.12) | <b>&lt;0.001</b> |                            |                  |
| Any Severity Score >75 <sup>th</sup> Percentile |                                |                            |                   |                  |                            |                  |
| Yes                                             | 56 (50.4%)                     | 55 (49.6%)                 | 4.71 (2.86, 7.73) | <b>&lt;0.001</b> | 4.57 (2.69, 7.78)          | <b>&lt;0.001</b> |
| No                                              | 206 (82.7%)                    | 43 (17.3%)                 | Reference         |                  | Reference                  |                  |
| History of Transplant                           | 41 (73.2%)                     | 15 (26.8%)                 | 1.17 (0.63, 2.17) | 0.618            |                            |                  |
| Sepsis and AKI Status                           |                                |                            |                   |                  |                            |                  |
| Sepsis and AKI (4)                              | 201 (65.5%)                    | 106 (34.5%)                | 2.60 (1.85, 3.65) | <b>&lt;0.001</b> | 2.79 (1.64, 4.73)          | <b>&lt;0.001</b> |
| Sepsis and No AKI (2)                           | 374 (83.1%)                    | 76 (16.9%)                 | Reference         |                  | Reference                  |                  |

ICU = Intensive Care Unit, AKI = Acute Kidney Injury, PRISM-III = Pediatric Risk of Mortality 3, PIM-2 = Pediatric Index of Mortality 2, PELOD= Pediatric Logistic Organ Dysfunction, CNS = Central Nervous System, MV = Mechanical Ventilation, CRRT = Continuous Renal Replacement Therapy, ECMO = Extracorporeal Membrane Oxygenation

<sup>1</sup>OR increments in units of 5; <sup>2</sup>Multivariable ROC = 0.76 and sample size = 360, due to list-wise deletion

<sup>3</sup>Mortality, CRRT, ECMO, ICU and MV covariates were not included as they comprise the definition of complex ICU
