# Supplementary material
Source: PubMed Central journal article supplement (PMC7852056)
Supplement: 41390_2021_1363_MOESM4_ESM.pdf [file 41390_2021_1363_MOESM4_ESM.pdf]

**Online Resource 3: P-values for AKI Severity in Sepsis patients**

| Category, N (%) <sup>1</sup>                    | Unadjusted         |                    |                    | Adjusted <sup>2</sup> |                    |                    |
|-------------------------------------------------|--------------------|--------------------|--------------------|-----------------------|--------------------|--------------------|
|                                                 | 1 vs. 2<br>P-Value | 1 vs. 3<br>P-Value | 2 vs. 3<br>P-Value | 1 vs. 2<br>P-Value    | 1 vs. 3<br>P-Value | 2 vs. 3<br>P-Value |
| <b>Demographics/Clinical</b>                    |                    |                    |                    |                       |                    |                    |
| Age at ICU Admission (years)                    | 0.184              | 0.232              | 0.947              |                       |                    |                    |
| Male Gender                                     | 0.648              | 0.375              | 0.278              |                       |                    |                    |
| Weight at ICU Admission (kg)                    | 0.097              | 0.032              | 0.785              |                       |                    |                    |
| Any Comorbid Conditions                         | 0.366              | 0.538              | 0.769              |                       |                    |                    |
| Admission Diagnosis                             |                    |                    |                    |                       |                    |                    |
| Shock                                           | 0.080              | <b>&lt;0.001</b>   | 0.028              |                       |                    |                    |
| Medical Cardiac                                 | 0.774              | 0.432              | 0.521              |                       |                    |                    |
| Respiratory Failure                             | 0.187              | 0.522              | 0.535              |                       |                    |                    |
| Post-Surgical/Minor Trauma                      | 0.316              | 0.437              | 0.146              |                       |                    |                    |
| CNS Dysfunction                                 | 0.669              | 0.246              | 0.572              |                       |                    |                    |
| Pain/Sedation Management                        | 0.489              | 1.000              | 0.705              |                       |                    |                    |
| History of Transplant                           | <b>&lt;0.001</b>   | <b>&lt;0.001</b>   | 0.855              |                       |                    |                    |
| PRISM-III                                       | 0.686              | <b>&lt;0.001</b>   | <b>&lt;0.001</b>   |                       |                    |                    |
| PIM-2                                           | 0.829              | <b>0.007</b>       | 0.023              |                       |                    |                    |
| PELOD                                           | 0.227              | <b>0.003</b>       | 0.095              |                       |                    |                    |
| Any Severity Score >75 <sup>th</sup> Percentile | 0.328              | <b>0.006</b>       | <b>0.005</b>       |                       |                    |                    |
| <b>Outcomes</b>                                 |                    |                    |                    |                       |                    |                    |
| Mechanical Ventilation Use                      | 0.992              | <b>&lt;0.001</b>   | <b>0.005</b>       | 0.928                 | <b>0.007</b>       | 0.033              |
| CRRT Use                                        | 0.553              | <b>&lt;0.001</b>   | <b>&lt;0.001</b>   | 0.308                 | <b>&lt;0.001</b>   | <b>0.006</b>       |
| ECMO Use                                        | 1.000              | 0.182              | 0.229              | 0.963                 | 0.076              | 0.957              |
| 28-Day Mortality                                | 0.876              | <b>&lt;0.001</b>   | <b>&lt;0.001</b>   | 0.897                 | <b>0.001</b>       | 0.034              |
| 28-Day MV-Free Days                             | 0.209              | <b>&lt;0.001</b>   | <b>0.008</b>       | 0.304                 | <b>&lt;0.001</b>   | 0.088              |
| 28-Day ICU-Free Days                            | 0.018              | <b>&lt;0.001</b>   | <b>&lt;0.001</b>   | 0.106                 | <b>&lt;0.001</b>   | <b>0.007</b>       |
| Complex ICU course                              | 0.195              | <b>&lt;0.001</b>   | <b>&lt;0.001</b>   | 0.990                 | <b>&lt;0.001</b>   | <b>&lt;0.001</b>   |

ICU = Intensive Care Unit, AKI = Acute Kidney Injury, PRISM-III = Pediatric Risk of Mortality 3, PIM-2 = Pediatric Index of Mortality 2, PELOD= Pediatric Logistic Organ Dysfunction, CNS = Central Nervous System, MV = Mechanical Ventilation, CRRT = Continuous Renal Replacement Therapy, ECMO = Extracorporeal Membrane Oxygenation

<sup>1</sup>P-values considered at the Bonferroni threshold (0.05 / 3 = 0.017)

<sup>2</sup>Outcome p-values adjusted for SOI score (i.e., Any SOI > 75<sup>th</sup>)
