# Supplementary material
Source: PubMed Central journal article supplement (PMC7852056)
Supplement: 41390_2021_1363_MOESM5_ESM.pdf [file 41390_2021_1363_MOESM5_ESM.pdf]

**Online Resource 4: P-values for AKI Temporality in Sepsis patients**

| Category, N (%) <sup>1</sup>                    | Unadjusted         |                    |                    | Adjusted <sup>2</sup> |                    |                    |
|-------------------------------------------------|--------------------|--------------------|--------------------|-----------------------|--------------------|--------------------|
|                                                 | 1 vs. 2<br>P-Value | 1 vs. 3<br>P-Value | 2 vs. 3<br>P-Value | 1 vs. 2<br>P-Value    | 1 vs. 3<br>P-Value | 2 vs. 3<br>P-Value |
| <b>Demographics/Clinical</b>                    |                    |                    |                    |                       |                    |                    |
| Age at ICU Admission (years)                    | 0.256              | 0.311              | 0.770              |                       |                    |                    |
| Male Gender                                     | 0.480              | 0.653              | 0.898              |                       |                    |                    |
| Weight at ICU Admission (kg)                    | 0.063              | 0.115              | 0.995              |                       |                    |                    |
| Any Comorbid Conditions                         | 0.274              | 0.720              | 0.609              |                       |                    |                    |
| Admission Diagnosis                             |                    |                    |                    |                       |                    |                    |
| Shock                                           | <b>&lt;0.001</b>   | <b>0.007</b>       | 0.539              |                       |                    |                    |
| Medical Cardiac                                 | 1.000              | 0.754              | 0.742              |                       |                    |                    |
| Respiratory Failure                             | <b>0.010</b>       | 0.643              | 0.020              |                       |                    |                    |
| Post-Surgical/Minor Trauma                      | 0.547              | 0.701              | 0.447              |                       |                    |                    |
| CNS Dysfunction                                 | 0.934              | 0.097              | 0.156              |                       |                    |                    |
| Pain/Sedation Management                        | 0.220              | 0.365              | 0.084              |                       |                    |                    |
| History of Transplant                           | <b>&lt;0.001</b>   | <b>&lt;0.001</b>   | 0.414              |                       |                    |                    |
| PRISM-III                                       | 0.021              | <b>&lt;0.001</b>   | 0.102              |                       |                    |                    |
| PIM-2                                           | 0.993              | 0.029              | 0.127              |                       |                    |                    |
| PELOD                                           | 0.293              | <b>0.002</b>       | 0.050              |                       |                    |                    |
| Any Severity Score >75 <sup>th</sup> Percentile | 0.502              | 0.131              | 0.495              |                       |                    |                    |
| <b>Outcomes</b>                                 |                    |                    |                    |                       |                    |                    |
| Mechanical Ventilation Use                      | 0.811              | <b>&lt;0.001</b>   | <b>&lt;0.001</b>   | 0.807                 | <b>0.009</b>       | 0.020              |
| CRRT Use                                        | <b>0.002</b>       | <b>&lt;0.001</b>   | <b>&lt;0.001</b>   | <b>0.016</b>          | <b>&lt;0.001</b>   | <b>0.003</b>       |
| ECMO Use                                        | 1.000              | 0.108              | 0.216              | 0.649                 | 0.068              | 0.337              |
| 28-Day Mortality                                | <b>0.001</b>       | <b>0.001</b>       | 0.656              | <b>0.007</b>          | 0.037              | 0.595              |
| 28-Day MV-Free Days                             | 0.383              | <b>&lt;0.001</b>   | <b>0.003</b>       | 0.295                 | <b>&lt;0.001</b>   | 0.017              |
| 28-Day ICU-Free Days                            | 0.669              | <b>&lt;0.001</b>   | <b>&lt;0.001</b>   | 0.953                 | <b>&lt;0.001</b>   | <b>&lt;0.001</b>   |
| Complex ICU course                              | 0.089              | <b>&lt;0.001</b>   | <b>&lt;0.001</b>   | 0.577                 | <b>&lt;0.001</b>   | <b>0.001</b>       |

ICU = Intensive Care Unit, AKI = Acute Kidney Injury, PRISM-III = Pediatric Risk of Mortality 3, PIM-2 = Pediatric Index of Mortality 2, PELOD= Pediatric Logistic Organ Dysfunction, CNS = Central Nervous System, MV = Mechanical Ventilation, CRRT = Continuous Renal Replacement Therapy, ECMO = Extracorporeal Membrane Oxygenation

<sup>1</sup>P-values considered at the Bonferroni threshold (0.05 / 3 = 0.017)

<sup>2</sup>Outcome p-values adjusted for SOI score (i.e., Any SOI > 75<sup>th</sup>)
