# Supplementary material
Source: PubMed Central journal article supplement (PMC7852056)
Supplement: 41390_2021_1363_MOESM6_ESM.pdf [file 41390_2021_1363_MOESM6_ESM.pdf]

**Online Resource 5:** Study characteristics by Sepsis and AKI Duration for patients surviving >48 hours in the ICU (N=707)

| Category, N (%)                                 | NO AKI (1)<br>N=445 (62.9%) | TRANSIENT AKI (2)<br>N=154 (21.8%) | PERSISTENT AKI (3)<br>N=108 (15.3%) |
|-------------------------------------------------|-----------------------------|------------------------------------|-------------------------------------|
| <b>Demographics/Clinical</b>                    |                             |                                    |                                     |
| Age at ICU Admission (years)                    | 3.7 (1.4, 11.9)             | 5.5 (1.7, 12.6)                    | 6.8 (1.2, 14.3)                     |
| Male Gender                                     | 231 (51.9%)                 | 86 (55.8%)                         | 59 (54.6%)                          |
| Weight at ICU Admission (kg)                    | 15.1 (9.7, 34.0)            | 19.8 (11.0, 46.2)                  | 20.0 (9.9, 48.6)                    |
| Any Comorbid Conditions                         | 372 (83.6%)                 | 133 (86.4%)                        | 92 (85.2%)                          |
| <b>Admission Diagnosis</b>                      |                             |                                    |                                     |
| Shock                                           | 234 (52.6%)                 | 106 (68.8%)                        | 73 (67.6%)                          |
| Medical Cardiac                                 | 13 (2.9%)                   | 4 (2.6%)                           | 4 (3.7%)                            |
| Respiratory Failure                             | 217 (48.8%)                 | 52 (33.8%)                         | 55 (50.9%)                          |
| Post-Surgical/Minor Trauma                      | 34 (7.6%)                   | 14 (9.1%)                          | 7 (6.5%)                            |
| CNS Dysfunction                                 | 99 (22.3%)                  | 33 (21.4%)                         | 16 (14.8%)                          |
| Pain/Sedation Management                        | 7 (1.6%)                    | 5 (3.3%)                           | 0 (0%)                              |
| History of Transplant                           | 15 (3.4%)                   | 17 (11%)                           | 16 (14.8%)                          |
| PRISM-III                                       | 4.0 (0.0, 10.0)             | 6.5 (2.0, 12.5)                    | 10.0 (7.0, 14.0)                    |
| PIM-2                                           | 1.0 (1.0, 4.0)              | 1.0 (1.0, 3.0)                     | 3.0 (1.0, 6.0)                      |
| PELOD                                           | 10.0 (1.0, 12.0)            | 11.0 (10.0, 12.0)                  | 12.0 (11.0, 22.0)                   |
| Any Severity Score >75 <sup>th</sup> Percentile | 64 (28.2%)                  | 15 (27.3%)                         | 21 (38.9%)                          |
| <b>Outcomes</b>                                 |                             |                                    |                                     |
| Mechanical Ventilation Use                      | 181 (43.6%)                 | 60 (40.3%)                         | 72 (66.7%)*                         |
| CRRT Use                                        | 2 (0.5%)                    | 5 (3.3%)                           | 21 (19.4%)*^                        |
| ECMO Use                                        | 6 (1.4%)                    | 2 (1.3%)                           | 4 (3.7%)                            |
| 28-Day Mortality                                | 16 (3.6%)                   | 8 (5.2%)                           | 15 (13.9%)*                         |
| 28-Day MV-Free Days                             | 24.0 (19.0, 26.0)           | 24.0 (21.0, 26.0)                  | 19.0 (3.0, 23.0)*^                  |
| 28-Day ICU-Free Days                            | 24.0 (21.0, 25.0)           | 25.0 (20.0, 26.0)                  | 17.0 (7.0, 21.0)*^                  |
| Complex ICU course                              | 71 (16%)                    | 26 (16.9%)                         | 57 (52.8%)*^                        |

ICU = Intensive Care Unit, AKI = Acute Kidney Injury, PRISM-III = Pediatric Risk of Mortality 3, PIM-2 = Pediatric Index of Mortality 2, PELOD= Pediatric Logistic Organ Dysfunction, CNS = Central Nervous System, MV = Mechanical Ventilation, CRRT = Continuous Renal Replacement Therapy, ECMO = Extracorporeal Membrane Oxygenation, Severity Score based on Sepsis sample (N=757)

<sup>1</sup>Of 757 sepsis patients, N=33 were excluded due to no AKI within first 48 hours of observation, and N=17 were excluded due to death within the first 48 hours in the ICU. After adjustment for univariates, p value <0.017 considered at the Bonferroni threshold (0.05/3) for: \*NO vs. PERSISTENT and ^TRANSIENT vs. PERSISTENT.
