# Supplementary material
Source: PubMed Central journal article supplement (PMC7852056)
Supplement: 41390_2021_1363_MOESM7_ESM.pdf [file 41390_2021_1363_MOESM7_ESM.pdf]

**Online Resource 6:** P-values for AKI Temporality in Sepsis patients for patients surviving >48 hours

| Category, N (%) <sup>1</sup>                    | Unadjusted         |                    |                    | Adjusted <sup>2</sup> |                    |                    |
|-------------------------------------------------|--------------------|--------------------|--------------------|-----------------------|--------------------|--------------------|
|                                                 | 1 vs. 2<br>P-Value | 1 vs. 3<br>P-Value | 2 vs. 3<br>P-Value | 1 vs. 2<br>P-Value    | 1 vs. 3<br>P-Value | 2 vs. 3<br>P-Value |
| <b>Demographics/Clinical</b>                    |                    |                    |                    |                       |                    |                    |
| Age at ICU Admission (years)                    | 0.189              | 0.297              | 0.850              |                       |                    |                    |
| Male Gender                                     | 0.399              | 0.612              | 0.846              |                       |                    |                    |
| Weight at ICU Admission (kg)                    | 0.035              | 0.111              | 0.843              |                       |                    |                    |
| Any Comorbid Conditions                         | 0.416              | 0.687              | 0.788              |                       |                    |                    |
| Admission Diagnosis                             |                    |                    |                    |                       |                    |                    |
| Shock                                           | <b>&lt;0.001</b>   | <b>0.005</b>       | 0.832              |                       |                    |                    |
| Medical Cardiac                                 | 1.000              | 0.755              | 0.721              |                       |                    |                    |
| Respiratory Failure                             | <b>0.001</b>       | 0.687              | <b>0.005</b>       |                       |                    |                    |
| Post-Surgical/Minor Trauma                      | 0.568              | 0.680              | 0.444              |                       |                    |                    |
| CNS Dysfunction                                 | 0.833              | 0.088              | 0.177              |                       |                    |                    |
| Pain/Sedation Management                        | 0.198              | 0.355              | 0.080              |                       |                    |                    |
| History of Transplant                           | <b>&lt;0.001</b>   | <b>&lt;0.001</b>   | 0.365              |                       |                    |                    |
| PRISM-III                                       | 0.033              | <b>&lt;0.001</b>   | 0.070              |                       |                    |                    |
| PIM-2                                           | 0.255              | 0.022              | <b>0.011</b>       |                       |                    |                    |
| PELOD                                           | 0.233              | <b>0.002</b>       | 0.067              |                       |                    |                    |
| Any Severity Score >75 <sup>th</sup> Percentile | 0.891              | 0.124              | 0.197              |                       |                    |                    |
| <b>Outcomes</b>                                 |                    |                    |                    |                       |                    |                    |
| Mechanical Ventilation Use                      | 0.479              | <b>&lt;0.001</b>   | <b>&lt;0.001</b>   | 0.795                 | <b>0.009</b>       | 0.022              |
| CRRT Use                                        | <b>0.014</b>       | <b>&lt;0.001</b>   | <b>&lt;0.001</b>   | 0.021                 | <b>&lt;0.001</b>   | <b>0.005</b>       |
| ECMO Use                                        | 1.000              | 0.111              | 0.234              | 0.541                 | 0.070              | 0.483              |
| 28-Day Mortality                                | 0.383              | <b>&lt;0.001</b>   | <b>0.014</b>       | 0.262                 | <b>0.019</b>       | 0.446              |
| 28-Day MV-Free Days                             | 0.723              | <b>&lt;0.001</b>   | <b>&lt;0.001</b>   | 0.882                 | <b>&lt;0.001</b>   | <b>0.002</b>       |
| 28-Day ICU-Free Days                            | 0.470              | <b>&lt;0.001</b>   | <b>&lt;0.001</b>   | 0.408                 | <b>&lt;0.001</b>   | <b>&lt;0.001</b>   |
| Complex ICU course                              | 0.788              | <b>&lt;0.001</b>   | <b>&lt;0.001</b>   | 0.619                 | <b>&lt;0.001</b>   | <b>&lt;0.001</b>   |

ICU = Intensive Care Unit, AKI = Acute Kidney Injury, PRISM-III = Pediatric Risk of Mortality 3, PIM-2 = Pediatric Index of Mortality 2, PELOD= Pediatric Logistic Organ Dysfunction, CNS = Central Nervous System, MV = Mechanical Ventilation, CRRT = Continuous Renal Replacement Therapy, ECMO = Extracorporeal Membrane Oxygenation

<sup>1</sup>P-values considered at the Bonferroni threshold (0.05 / 3 = 0.017)

<sup>2</sup>Outcome p-values adjusted for SOI score (i.e., Any SOI > 75<sup>th</sup>)
