# Supplementary material
Source: PubMed Central journal article supplement (PMC7852056)
Supplement: 41390_2021_1363_MOESM8_ESM.pdf [file 41390_2021_1363_MOESM8_ESM.pdf]

**Online Resource 7:** Study characteristics by Sepsis and AKI Severity + Temporality (AKI Severity gauged within first 48 hours, coinciding with Temporality assessment) (N=724)

| Category, N (%)*                                | NO AKI (1)<br>N=450 (62.2%) | MILD<br>TRANSIENT<br>AKI (2)<br>N=92 (12.7%) | SEVERE<br>TRANSIENT<br>AKI (3)<br>N=74 (10.2%) | MILD<br>PERSISTENT<br>AKI (4)<br>N=32 (4.4%) | SEVERE<br>PERSISTENT<br>AKI (5)<br>N=76 (10.5%) |
|-------------------------------------------------|-----------------------------|----------------------------------------------|------------------------------------------------|----------------------------------------------|-------------------------------------------------|
| <b>Demographics/Clinical</b>                    |                             |                                              |                                                |                                              |                                                 |
| Age at ICU Admission (years)                    | 3.8 (1.4, 11.9)             | 5.5 (1.7, 12.3)                              | 5.7 (1.3, 12.7)                                | 7.5 (1.3, 14.5)                              | 5.9 (1.0, 13.5)                                 |
| Male Gender                                     | 235 (52.2%)                 | 48 (52.2%)                                   | 44 (59.5%)                                     | 16 (50%)                                     | 43 (56.6%)                                      |
| Weight at ICU Admission (kg)                    | 15.1 (9.7, 34)              | 19 (10.8, 44.1)                              | 19.4 (9.4, 49.3)                               | 23.4 (10.4, 48.1)                            | 18.8 (9.8, 48.8)                                |
| Any Comorbid Conditions                         | 377 (83.8%)                 | 79 (85.9%)                                   | 66 (89.2%)                                     | 29 (90.6%)                                   | 63 (82.9%)                                      |
| <b>Admission Diagnosis</b>                      |                             |                                              |                                                |                                              |                                                 |
| Shock                                           | 239 (53.1%)                 | 61 (66.3%)                                   | 57 (77%)                                       | 15 (46.9%)                                   | 58 (76.3%)                                      |
| Medical Cardiac                                 | 13 (2.9%)                   | 2 (2.2%)                                     | 3 (4.1%)                                       | 0 (0%)                                       | 4 (5.3%)                                        |
| Respiratory Failure                             | 218 (48.4%)                 | 35 (38%)                                     | 26 (35.1%)                                     | 14 (43.8%)                                   | 41 (54%)                                        |
| Post-Surgical/Minor Trauma                      | 34 (7.6%)                   | 6 (6.5%)                                     | 9 (12.2%)                                      | 1 (3.1%)                                     | 6 (7.9%)                                        |
| CNS Dysfunction                                 | 99 (22%)                    | 17 (18.5%)                                   | 19 (25.7%)                                     | 6 (18.8%)                                    | 10 (13.2%)                                      |
| Pain/Sedation Management                        | 8 (1.8%)                    | 3 (3.3%)                                     | 3 (4.1%)                                       | 0 (0%)                                       | 0 (0%)                                          |
| History of Transplant                           | 17 (3.8%)                   | 10 (10.9%)                                   | 9 (12.2%)                                      | 6 (18.8%)                                    | 10 (13.2%)                                      |
| PRISM-III                                       | 4 (0, 10.5)                 | 5 (0.5, 10.5)                                | 11 (7, 22)                                     | 9 (7, 12)                                    | 10 (7, 16.5)                                    |
| PIM-2                                           | 1.5 (1, 4)                  | 1 (1, 3)                                     | 3 (1, 40)                                      | 2.5 (1, 5.5)                                 | 3 (1, 6)                                        |
| PELOD                                           | 10 (1, 12)                  | 10.5 (2, 12)                                 | 11.5 (10, 12)                                  | 12 (11, 22)                                  | 12 (11, 21)                                     |
| Any Severity Score >75 <sup>th</sup> Percentile | 65 (28.4%)                  | 7 (18.9%)                                    | 13 (54.2%)                                     | 5 (29.4%)                                    | 16 (43.2%)                                      |
| <b>Outcomes</b>                                 |                             |                                              |                                                |                                              |                                                 |
| Mechanical Ventilation Use                      | 182 (43.3%)                 | 33 (36.7%)                                   | 35 (49.3%)                                     | 21 (65.6%)                                   | 51 (67.1%)                                      |
| CRRT Use                                        | 2 (0.4%)                    | 0 (0%)                                       | 7 (9.5%)                                       | 3 (9.4%)                                     | 18 (23.7%)                                      |
| ECMO Use                                        | 6 (1.3%)                    | 0 (0%)                                       | 2 (2.7%)                                       | 2 (6.3%)                                     | 2 (2.6%)                                        |
| 28-Day Mortality                                | 21 (4.7%)                   | 4 (4.4%)                                     | 16 (21.6%)                                     | 3 (9.4%)                                     | 12 (15.8%)                                      |
| 28-Day MV-Free Days                             | 24 (19, 26)                 | 24 (21, 26)                                  | 22 (0, 26)                                     | 20.5 (4, 23.5)                               | 19 (0, 23)                                      |
| 28-Day ICU-Free Days                            | 24 (20, 25)                 | 25 (20, 26)                                  | 24 (7, 25)                                     | 15 (8, 21)                                   | 18 (7, 22)                                      |
| Complex ICU course                              | 76 (16.9%)                  | 14 (15.2%)                                   | 24 (32.4%)                                     | 16 (50%)                                     | 41 (54%)                                        |

AKI<sub>MT</sub> = MILD TRANSIENT AKI, AKI<sub>MP</sub> = MILD PERSISTENT AKI, AKI<sub>ST</sub> = SEVERE TRANSIENT AKI, AKI<sub>SP</sub> = SEVERE PERSISTENT AKI
