# Supplementary material
Source: PubMed Central journal article supplement (PMC7852056)
Supplement: 41390_2021_1363_MOESM9_ESM.pdf [file 41390_2021_1363_MOESM9_ESM.pdf]

**Online Resource 8:** P-values for AKI Severity + Temporality in Sepsis patients

| Category, N (%) <sup>*</sup>                    | Unadjusted         |                    |                    |                    |                    |                    | Adjusted <sup>2</sup> |                    |                    |                    |                    |                    |
|-------------------------------------------------|--------------------|--------------------|--------------------|--------------------|--------------------|--------------------|-----------------------|--------------------|--------------------|--------------------|--------------------|--------------------|
|                                                 | 2 vs. 3<br>P-Value | 2 vs. 4<br>P-Value | 2 vs. 5<br>P-Value | 3 vs. 4<br>P-Value | 3 vs. 5<br>P-Value | 4 vs. 5<br>P-Value | 2 vs. 3<br>P-Value    | 2 vs. 4<br>P-Value | 2 vs. 5<br>P-Value | 3 vs. 4<br>P-Value | 3 vs. 5<br>P-Value | 4 vs. 5<br>P-Value |
| Age at ICU Admission (years)                    | 0.884              | 0.496              | 0.924              | 0.706              | 0.948              | 0.670              |                       |                    |                    |                    |                    |                    |
| Male Gender                                     | 0.348              | 0.832              | 0.568              | 0.367              | 0.721              | 0.531              |                       |                    |                    |                    |                    |                    |
| Weight at ICU Admission (kg)                    | 0.910              | 0.829              | 0.994              | 0.937              | 0.873              | 0.941              |                       |                    |                    |                    |                    |                    |
| Any Comorbid Conditions                         | 0.523              | 0.760              | 0.596              | 1.000              | 0.267              | 0.384              |                       |                    |                    |                    |                    |                    |
| Admission Diagnosis                             |                    |                    |                    |                    |                    |                    |                       |                    |                    |                    |                    |                    |
| Shock                                           | 0.130              | 0.052              | 0.155              | <b>0.002</b>       | 0.918              | <b>0.003</b>       |                       |                    |                    |                    |                    |                    |
| Medical Cardiac                                 | 0.657              | 1.000              | 0.412              | 0.552              | 1.000              | 0.317              |                       |                    |                    |                    |                    |                    |
| Respiratory Failure                             | 0.699              | 0.570              | 0.039              | 0.401              | 0.021              | 0.333              |                       |                    |                    |                    |                    |                    |
| Post-Surgical/Minor Trauma                      | 0.208              | 0.676              | 0.731              | 0.276              | 0.384              | 0.671              |                       |                    |                    |                    |                    |                    |
| CNS Dysfunction                                 | 0.263              | 0.973              | 0.350              | 0.441              | 0.052              | 0.554              |                       |                    |                    |                    |                    |                    |
| Pain/Sedation Management                        | 1.000              | 0.568              | 0.252              | 0.552              | 0.118              | NA                 |                       |                    |                    |                    |                    |                    |
| History of Transplant                           | 0.795              | 0.357              | 0.649              | 0.377              | 0.855              | 0.554              |                       |                    |                    |                    |                    |                    |
| PRISM-III                                       | 0.011              | 0.204              | <b>0.004</b>       | 0.251              | 0.567              | 0.341              |                       |                    |                    |                    |                    |                    |
| PIM-2                                           | 0.119              | 0.112              | 0.014              | 0.624              | 0.923              | 0.651              |                       |                    |                    |                    |                    |                    |
| PELOD                                           | 0.416              | 0.091              | 0.064              | 0.468              | 0.534              | 0.804              |                       |                    |                    |                    |                    |                    |
| Any Severity Score >75 <sup>th</sup> Percentile | <b>0.004</b>       | 0.486              | 0.024              | 0.116              | 0.404              | 0.333              |                       |                    |                    |                    |                    |                    |
|                                                 |                    |                    |                    |                    |                    |                    |                       |                    |                    |                    |                    |                    |
| Mechanical Ventilation Use                      | 0.107              | <b>0.005</b>       | <b>&lt;0.001</b>   | 0.124              | 0.029              | 0.882              | 0.064                 | 0.042              | <b>0.005</b>       | 0.543              | 0.573              | 0.899              |
| CRRT Use                                        | <b>0.003</b>       | 0.016              | <b>&lt;0.001</b>   | 1.000              | 0.019              | 0.086              | 0.951                 | 0.951              | 0.933              | 0.928              | 0.038              | 0.092              |
| ECMO Use                                        | 0.197              | 0.065              | 0.203              | 0.582              | 1.000              | 0.580              | 0.963                 | 0.956              | 0.949              | 0.472              | 0.675              | 0.678              |
| 28-Day Mortality                                | <b>0.001</b>       | 0.373              | 0.012              | 0.131              | 0.359              | 0.545              | 0.046                 | 0.204              | 0.307              | 0.584              | 0.100              | 0.594              |
| 28-Day MV-Free Days                             | 0.389              | 0.016              | <b>0.002</b>       | 0.312              | 0.139              | 0.729              | 0.600                 | 0.151              | 0.019              | 0.319              | 0.015              | 0.524              |
| 28-Day ICU-Free Days                            | 0.098              | <b>&lt;0.001</b>   | <b>&lt;0.001</b>   | <b>0.007</b>       | <b>&lt;0.001</b>   | 0.951              | 0.448                 | <b>&lt;0.001</b>   | <b>&lt;0.001</b>   | 0.009              | <b>0.005</b>       | 0.721              |
| Complex ICU course                              | 0.009              | <b>&lt;0.001</b>   | <b>&lt;0.001</b>   | 0.087              | <b>0.007</b>       | 0.708              | 0.049                 | <b>0.002</b>       | <b>&lt;0.001</b>   | 0.308              | 0.104              | 0.812              |

<sup>1</sup>P-values considered at the Bonferroni threshold (0.05 / 6 = 0.008)

<sup>2</sup>Outcome p-values adjusted for SOI score (i.e., Any SOI > 75<sup>th</sup>)
