# Supplementary material
Source: PubMed Central journal article supplement (PMC7852056)
Supplement: 41390_2021_1363_MOESM10_ESM.pdf [file 41390_2021_1363_MOESM10_ESM.pdf]

**Online Resource 9: 28-Day Mortality Cumulative Incidence of Septic Patients**

| Study Group       | N   | Mortality Events | Discharge Events | 28-Day Mortality Cum. Inc. (95% CI) | Gray's P-Value   | Pairwise (1) | Pairwise (2) | Pairwise (3) |
|-------------------|-----|------------------|------------------|-------------------------------------|------------------|--------------|--------------|--------------|
| No                | 403 | 20               | 376              | 5.0% (3.1%, 7.4%)                   | <b>&lt;0.001</b> |              |              |              |
| Any               | 288 | 35               | 247              | 12.2% (8.7%, 16.2%)                 |                  |              |              |              |
|                   |     |                  |                  |                                     |                  |              |              |              |
| Mild              | 132 | 6                | 123              | 4.6% (1.8%, 9.2%)                   | <b>&lt;0.001</b> |              |              |              |
| Severe            | 156 | 29               | 124              | 18.6% (12.9%, 25.0%)                |                  |              |              |              |
|                   |     |                  |                  |                                     |                  |              |              |              |
| Transient         | 159 | 20               | 136              | 12.6% (8.0%, 18.2%)                 | 0.981            |              |              |              |
| Persistent        | 99  | 13               | 83               | 13.1% (7.4%, 20.6%)                 |                  |              |              |              |
|                   |     |                  |                  |                                     |                  |              |              |              |
| Mild Transient    | 88  | 4                | 82               | 4.6% (1.4%, 10.6%)                  | <b>0.007</b>     | <b>***</b>   |              |              |
| Severe Transient  | 71  | 16               | 54               | 22.5% (13.8%, 32.7%)                |                  | <b>0.001</b> | <b>***</b>   |              |
| Mild Persistent   | 29  | 3                | 25               | 10.3% (2.4%, 25.1%)                 |                  | 0.271        | 0.132        | <b>***</b>   |
| Severe Persistent | 70  | 10               | 58               | 14.3% (7.3%, 23.6%)                 |                  | 0.038        | 0.140        | 0.540        |

AKI<sub>MT</sub> = MILD TRANSIENT AKI, AKI<sub>MP</sub> = MILD PERSISTENT AKI, AKI<sub>ST</sub> = SEVERE TRANSIENT AKI, AKI<sub>SP</sub> = SEVERE PERSISTENT AKI

<sup>1</sup>Pairwise p-values considered at the Bonferroni threshold (0.05 / 6 = 0.008)

<sup>2</sup>Censored events were alive in the ICU at Day 28
