# Supplementary material
Source: PubMed Central journal article supplement (PMC7852056)
Supplement: 41390_2021_1363_MOESM11_ESM.pdf [file 41390_2021_1363_MOESM11_ESM.pdf]

**Online Resource 10: 28-Day ICU Discharge Cumulative Incidence**

| Study Group       | 28-Day ICU Discharge Cum. Inc. (95% CI) | Gray's P-Value   | Pairwise (1)     | Pairwise (2) | Pairwise (3) |
|-------------------|-----------------------------------------|------------------|------------------|--------------|--------------|
| No                | 93.3% (90.4%, 95.4%)                    | <b>&lt;0.001</b> |                  |              |              |
| Any               | 85.8% (81.2%, 89.3%)                    |                  |                  |              |              |
| Mild              | 93.2% (87.0%, 96.5%)                    | <b>&lt;0.001</b> |                  |              |              |
| Severe            | 79.5% (72.3%, 85.0%)                    |                  |                  |              |              |
| Transient         | 85.5% (79.0%, 90.1%)                    | <b>0.001</b>     |                  |              |              |
| Persistent        | 83.8% (74.8%, 89.8%)                    |                  |                  |              |              |
| Mild Transient    | 93.2% (84.9%, 97.0%)                    | <b>&lt;0.001</b> | ***              |              |              |
| Severe Transient  | 76.1% (64.3%, 84.4%)                    |                  | 0.012            | ***          |              |
| Mild Persistent   | 86.2% (65.5%, 94.9%)                    |                  | <b>0.006</b>     | 0.413        | ***          |
| Severe Persistent | 82.9% (71.4%, 90.0%)                    |                  | <b>&lt;0.001</b> | 0.282        | 0.892        |

AKI<sub>MT</sub> = MILD TRANSIENT AKI, AKI<sub>MP</sub> = MILD PERSISTENT AKI, AKI<sub>ST</sub> = SEVERE TRANSIENT AKI, AKI<sub>SP</sub> = SEVERE PERSISTENT AKI

<sup>1</sup>Pairwise p-values considered at the Bonferroni threshold (0.05 / 6 = 0.008)

<sup>2</sup>Censored events were alive in the ICU at Day 28
