# Supplementary material
Source: PubMed Central journal article supplement (PMC7852056)
Supplement: 41390_2021_1363_MOESM12_ESM.pdf [file 41390_2021_1363_MOESM12_ESM.pdf]

**Online Resource 11: Study characteristics by Severe AKI and AKI-CRRT (N=170)**

| Category, N (%)                                 | SEVERE AKI<br>N=141 (82.9%) | AKI-CRRT<br>N=29 (17.1%) | P-Value          |
|-------------------------------------------------|-----------------------------|--------------------------|------------------|
| <b><i>Demographics/Clinical</i></b>             |                             |                          |                  |
| Age at ICU Admission (years)                    | 5.8 (1.3, 13.0)             | 7.5 (1.7, 14.2)          | 0.559            |
| Male Gender                                     | 79 (56%)                    | 16 (55.2%)               | 0.933            |
| Weight at ICU Admission (kg)                    | 19.5 (9.7, 46.2)            | 20.0 (12.9, 55.0)        | 0.316            |
| Any Comorbid Conditions                         | 121 (85.5%)                 | 25 (86.2%)               | 1.000            |
| <b>Admission Diagnosis</b>                      |                             |                          |                  |
| Shock                                           | 99 (70.2%)                  | 26 (89.7%)               | <b>0.031</b>     |
| Medical Cardiac                                 | 4 (2.8%)                    | 3 (10.3%)                | 0.097            |
| Respiratory Failure                             | 59 (41.8%)                  | 18 (62.1%)               | <b>0.046</b>     |
| Post-Surgical/Minor Trauma                      | 15 (10.6%)                  | 2 (6.9%)                 | 0.740            |
| CNS Dysfunction                                 | 28 (19.9%)                  | 2 (6.9%)                 | 0.095            |
| Pain/Sedation Management                        | 3 (2.1%)                    | 0 (0%)                   | 1.000            |
| History of Transplant                           | 19 (13.5%)                  | 4 (13.8%)                | 1.000            |
| PRISM-III                                       | 9.0 (6.0, 12.5)             | 14.0 (7.0, 22.0)         | <b>0.032</b>     |
| PIM-2                                           | 3.0 (1.0, 6.0)              | 4.5 (3.0, 25.0)          | 0.073            |
| PELOD                                           | 11.0 (10.0, 12.0)           | 32.0 (23.0, 41.0)        | <b>0.001</b>     |
| Any Severity Score >75 <sup>th</sup> Percentile | 19 (36.5%)                  | 14 (66.7%)               | <b>0.019</b>     |
| <b><i>Outcomes</i></b>                          |                             |                          |                  |
| Mechanical Ventilation Use                      | 75 (54.4%)                  | 25 (86.2%)               | <b>0.002</b>     |
| ECMO Use                                        | 0 (0%)                      | 5 (17.2%)                | <b>&lt;0.001</b> |
| 28-Day Mortality                                | 17 (12.1%)                  | 14 (48.3%)               | <b>&lt;0.001</b> |
| 28-Day MV-Free Days                             | 21.0 (13.0, 25.0)           | 0.0 (0.0, 16.5)          | <b>&lt;0.001</b> |
| 28-Day ICU-Free Days                            | 21.0 (14.0, 24.0)           | 0.0 (0.0, 13.0)          | <b>&lt;0.001</b> |

ICU = Intensive Care Unit, AKI = Acute Kidney Injury, PRISM-III = Pediatric Risk of Mortality 3, PIM-2 = Pediatric Index of Mortality 2, PELOD= Pediatric Logistic Organ Dysfunction, CNS = Central Nervous System, MV = Mechanical Ventilation, CRRT = Continuous Renal Replacement Therapy, ECMO = Extracorporeal Membrane Oxygenation, Severity Score based on Sepsis sample (N=757)
