# Supplementary material
Source: PubMed Central journal article supplement (PMC7852056)
Supplement: 41390_2021_1363_MOESM13_ESM.pdf [file 41390_2021_1363_MOESM13_ESM.pdf]

**Online Resource 12: 28-Day Mortality Cumulative Incidence of Septic Patients for those surviving >48 hours in the ICU**

| Study Group       | N   | Mortality Events | Discharge Events | 28-Day Mortality Cum. Inc. (95% CI) | Gray's P-Value | Pairwise (1) | Pairwise (2) | Pairwise (3) |
|-------------------|-----|------------------|------------------|-------------------------------------|----------------|--------------|--------------|--------------|
| No                | 398 | 16               | 375              | 4.0% (2.4%, 6.3%)                   | <b>0.017</b>   |              |              |              |
| Any               | 276 | 23               | 247              | 8.3% (5.5%, 11.9%)                  |                |              |              |              |
|                   |     |                  |                  |                                     |                |              |              |              |
| Mild              | 130 | 4                | 123              | 3.1% (1%, 7.3%)                     | <b>0.003</b>   |              |              |              |
| Severe            | 146 | 19               | 124              | 13.0% (8.2%, 19.0%)                 |                |              |              |              |
|                   |     |                  |                  |                                     |                |              |              |              |
| Transient         | 147 | 8                | 136              | 5.4% (2.5%, 10%)                    | <b>0.040</b>   |              |              |              |
| Persistent        | 99  | 13               | 83               | 13.1% (7.4%, 20.6%)                 |                |              |              |              |
|                   |     |                  |                  |                                     |                |              |              |              |
| Mild Transient    | 86  | 2                | 82               | 2.3% (0.4%, 7.8%)                   | 0.061          | ***          |              |              |
| Severe Transient  | 61  | 6                | 54               | 9.8% (4.0%, 18.8%)                  |                | 0.053        | ***          |              |
| Mild Persistent   | 29  | 3                | 25               | 10.3% (2.4%, 25.1%)                 |                | 0.072        | 0.984        | ***          |
| Severe Persistent | 70  | 10               | 58               | 14.3% (7.3%, 23.6%)                 |                | <b>0.006</b> | 0.507        | 0.540        |

AKI<sub>MT</sub> = MILD TRANSIENT AKI, AKI<sub>MP</sub> = MILD PERSISTENT AKI, AKI<sub>ST</sub> = SEVERE TRANSIENT AKI, AKI<sub>SP</sub> = SEVERE PERSISTENT AKI

<sup>1</sup>Pairwise p-values considered at the Bonferroni threshold (0.05 / 6 = 0.008)

<sup>2</sup>Censored events were alive in the ICU at Day 28
