# Supplementary material
Source: PubMed Central journal article supplement (PMC7852056)
Supplement: 41390_2021_1363_MOESM14_ESM.pdf [file 41390_2021_1363_MOESM14_ESM.pdf]

**Online Resource 13: 28-Day ICU Discharge Cumulative Incidence in patients surviving >48 hours in the ICU**

| Study Group       | 28-Day ICU Discharge Cum. Inc. (95% CI) | Gray's P-Value | Pairwise (1) | Pairwise (2) | Pairwise (3) |
|-------------------|-----------------------------------------|----------------|--------------|--------------|--------------|
| No                | 94.2% (91.4%, 96.1%)                    | <0.001         |              |              |              |
| Any               | 89.5% (85.3%, 92.6%)                    |                |              |              |              |
| Mild              | 94.6% (88.7%, 97.5%)                    | 0.001          |              |              |              |
| Severe            | 84.9% (78%, 89.8%)                      |                |              |              |              |
| Transient         | 92.5% (86.8%, 95.8%)                    | <0.001         |              |              |              |
| Persistent        | 83.8% (74.8%, 89.8%)                    |                |              |              |              |
| Mild Transient    | 95.4% (87.2%, 98.4%)                    | <0.001         | ***          |              |              |
| Severe Transient  | 88.5% (76.8%, 94.5%)                    |                | 0.303        | ***          |              |
| Mild Persistent   | 86.2% (65.5%, 94.9%)                    |                | 0.003        | 0.030        | ***          |
| Severe Persistent | 82.9% (71.4%, 90.0%)                    |                | <0.001       | 0.005        | 0.892        |

AKI<sub>MT</sub> = MILD TRANSIENT AKI, AKI<sub>MP</sub> = MILD PERSISTENT AKI, AKI<sub>ST</sub> = SEVERE TRANSIENT AKI, AKI<sub>SP</sub> = SEVERE PERSISTENT AKI

<sup>1</sup>Pairwise p-values considered at the Bonferroni threshold (0.05 / 6 = 0.008)

<sup>2</sup>Censored events were alive in the ICU at Day 28
